# Supplementary material for: Collagen Q and anti-MuSK autoantibody competitively suppress agrin/LRP4/MuSK signaling
Source: PubMed Central journal article supplement (PMC4564764; doi:10.1038/srep13928), 2015-09-10
Supplement: srep13928-s1.pdf [file srep13928-s1.pdf]

## Supplementary Information

### **Collagen Q and anti-MuSK autoantibody competitively suppress agrin/LRP4/MuSK signaling**

Kenji Otsuka<sup>1</sup>, Mikako Ito<sup>1</sup>, Bisei Ohkawara<sup>1</sup>, Akio Masuda<sup>1</sup>, Yu Kawakami<sup>1</sup>, Ko Sahashi<sup>2</sup>, Hiroshi Nishida<sup>3</sup>, Naoki Mabuchi<sup>4</sup>, Akemi Takano<sup>5</sup>, Andrew G. Engel<sup>6</sup>, Kinji Ohno<sup>1</sup>

<sup>1</sup>Division of Neurogenetics, Center for Neurological Diseases and Cancer, Nagoya University Graduate School of Medicine, Nagoya, Japan

<sup>2</sup>Department of Neurology, Aichi Medical University, Aichi, Japan

<sup>3</sup>Department of Neurology, Gifu Prefectural General Medical Center, Gifu, Japan

<sup>4</sup>Department of Neurology, Okazaki City Hospital, Okazaki, Japan

<sup>5</sup>Department of Neurology, Meitetsu Hospital, Nagoya, Japan

<sup>6</sup>Department of Neurology, Mayo Clinic, Rochester, Minnesota

Address correspondence to Dr. Ohno, Division of Neurogenetics, Center for Neurological Diseases and Cancer, Nagoya University Graduate School of Medicine, 65 Tsurumai, Showa-ku, Nagoya 466-8550, Japan.

e-mail: ohnok@med.nagoya-u.ac.jp

Supplementary information includes:

Supplementary Figures S1-S2

Supplementary Table 1

### a. MuSK

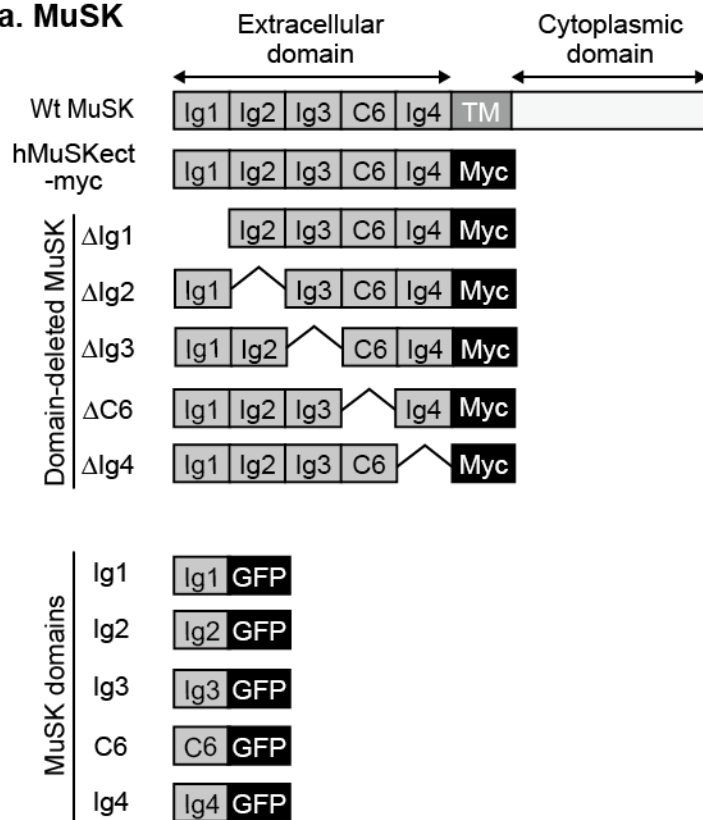

### b. LRP4

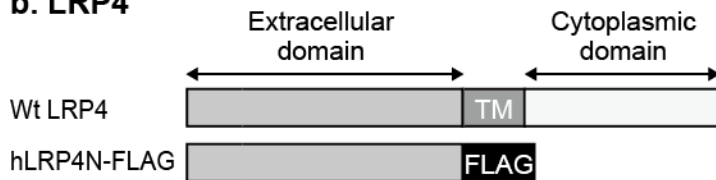

### c. ColQ

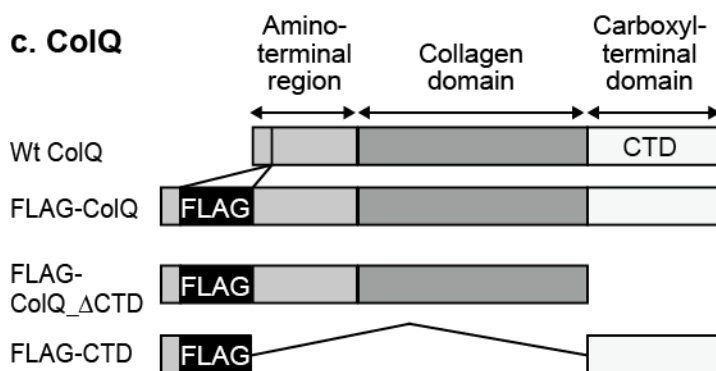

### Supplementary Figure S1.

Schemes of expression constructs. (a) hMuSKect-myc carries the extracellular domain of human MuSK that is fused to the myc tag. ΔIg1 to ΔIg4 lack immunoglobulin-like domains 1 to 4, respectively. ΔC6 lacks the C6 box having six cysteines. We also generated plasmids expressing individual domains (Ig1-Ig4 and C6) fused to GFP. Wt, wild-type construct. TM, transmembrane domain. (b) hLRP4N-FLAG is an N-terminal extracellular domain of LRP4 fused to FLAG. (c) FLAG is inserted between codons 105 and 106 of human ColQ to generate FLAG-ColQ. C-terminal domain (CTD) is deleted to generate FLAG-ColQ\_ΔCTD. Similarly, the amino-terminal region and collagen domain is deleted to generate FLAG-CTD.

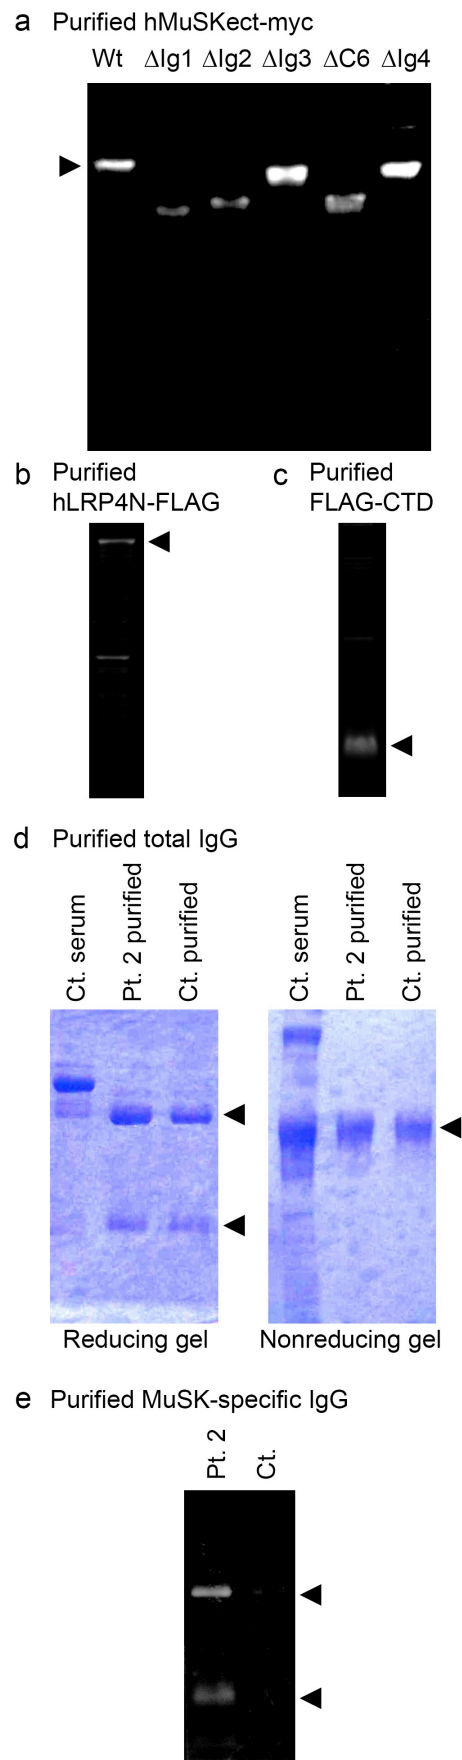

### Supplementary Figure S2. The

whole-protein staining of purified proteins. Reducing SDS-PAGE followed by protein staining with the Oriole Fluorescent Gel Stain (Bio-Rad) of purified wild-type and domain-deleted hMuSKect-myc (a), hLRP4N-FLAG (b), FLAG-CTD (c), and MuSK-specific IgG of Pt. 2 and Ct. (e). (d) Reducing and nonreducing SDS-PAGE of control serum and purified total IgG of Pt. 2 and Ct., followed by Coomassie staining. Arrowheads point to estimated molecular weights of expected proteins. Note that domain-deleted hMuSKect-myc have lower molecular weights than wild-type hMuSKect-myc.

**Supplementary Table 1. Morphometric parameters of AChR and MuSK at NMJ of wild-type and *Colq*<sup>-/-</sup> mice that are passively transferred with MuSK-IgG.**

|                                   | Wild-type mice | <i>Colq</i> <sup>-/-</sup> mice | <i>P</i> |
|-----------------------------------|----------------|---------------------------------|----------|
| AChR signal area                  | 31.5 ± 31.2    | 40.1 ± 21.2                     | 0.152    |
| AChR signal intensity             | 27.3 ± 27.6    | 33.5 ± 20.1                     | 0.263    |
| AChR signal intensity/signal area | 83.9 ± 10.0    | 77.9 ± 13.9                     | 0.039    |
| MuSK signal area                  | 37.2 ± 37.4    | 26.8 ± 31.9                     | 0.210    |
| MuSK signal intensity             | 30.5 ± 34.4    | 27.8 ± 41.1                     | 0.761    |
| MuSK signal intensity/signal area | 80.3 ± 8.59    | 97.8 ± 13.6                     | < 0.001  |

For both AChR and MuSK, relative areas and intensities are compared to those in mice injected with IgG purified from Ct. serum. Mean and SD are indicated.
